# Supplementary material
Source: MDPI journal article supplement (https://www.mdpi.com/2311-7524/10/5/474)
Supplement: s1 [file s1]

# Supplimentaiial meterial

The below tables are the outcome of the significance test of *S. alpinus* during the one-way test of the carbon source and nitrogen source

Table S1 significance tests of MS-10 for carbon source

| carbon source | Repeat group number | Mean Difference(I-J) | Standard Error | Significance | 95% confidence interval |             |
|---------------|---------------------|----------------------|----------------|--------------|-------------------------|-------------|
|               |                     |                      |                |              | Lower limit             | Upper limit |
| CK            | 2                   | -2.16                | 0.22765        | 0            | -2.6403                 | -1.6797     |
|               | 3                   | -2.12667             | 0.25453        | 0            | -2.6637                 | -1.5897     |
|               | 4                   | -2.89333             | 0.22765        | 0            | -3.3736                 | -2.413      |
|               | 5                   | -5.01667             | 0.22765        | 0            | -5.497                  | -4.5364     |
|               | 6                   | -2.34667             | 0.22765        | 0            | -2.827                  | -1.8664     |
|               | 7                   | -1.49167             | 0.25453        | 0            | -2.0287                 | -0.9547     |
|               | 8                   | -1.97333             | 0.22765        | 0            | -2.4536                 | -1.493      |
|               | 9                   | -2.43667             | 0.25453        | 0            | -2.9737                 | -1.8997     |
|               | 10                  | -4                   | 0.22765        | 0            | -4.4803                 | -3.5197     |
| maltose       | 1                   | 2.16                 | 0.22765        | 0            | 1.6797                  | 2.6403      |
|               | 3                   | 0.03333              | 0.25453        | 0.897        | -0.5037                 | 0.5703      |
|               | 4                   | -0.73333             | 0.22765        | 0.005        | -1.2136                 | -0.253      |
|               | 5                   | -2.85667             | 0.22765        | 0            | -3.337                  | -2.3764     |
|               | 6                   | -0.18667             | 0.22765        | 0.424        | -0.667                  | 0.2936      |
|               | 7                   | 0.66833              | 0.25453        | 0.018        | 0.1313                  | 1.2053      |
|               | 8                   | 0.18667              | 0.22765        | 0.424        | -0.2936                 | 0.667       |
|               | 9                   | -0.27667             | 0.25453        | 0.292        | -0.8137                 | 0.2603      |
|               | 10                  | -1.84                | 0.22765        | 0            | -2.3203                 | -1.3597     |
| sucrose       | 1                   | 2.12667              | 0.25453        | 0            | 1.5897                  | 2.6637      |
|               | 2                   | -0.03333             | 0.25453        | 0.897        | -0.5703                 | 0.5037      |
|               | 4                   | -0.76667             | 0.25453        | 0.008        | -1.3037                 | -0.2297     |
|               | 5                   | -2.89                | 0.25453        | 0            | -3.427                  | -2.353      |
|               | 6                   | -0.22                | 0.25453        | 0.399        | -0.757                  | 0.317       |
|               | 7                   | 0.635                | 0.27882        | 0.036        | 0.0467                  | 1.2233      |
|               | 8                   | 0.15333              | 0.25453        | 0.555        | -0.3837                 | 0.6903      |
|               | 9                   | -0.31                | 0.27882        | 0.282        | -0.8983                 | 0.2783      |
|               | 10                  | -1.87333             | 0.25453        | 0            | -2.4103                 | -1.3363     |
| glucose       | 1                   | 2.89333              | 0.22765        | 0            | 2.413                   | 3.3736      |
|               | 2                   | 0.73333              | 0.22765        | 0.005        | 0.253                   | 1.2136      |
|               | 3                   | 0.76667              | 0.25453        | 0.008        | 0.2297                  | 1.3037      |
|               | 5                   | -2.12333             | 0.22765        | 0            | -2.6036                 | -1.643      |
|               | 6                   | 0.54667              | 0.22765        | 0.028        | 0.0664                  | 1.027       |
|               | 7                   | 1.40167              | 0.25453        | 0            | 0.8647                  | 1.9387      |
|               | 8                   | 0.92                 | 0.22765        | 0.001        | 0.4397                  | 1.4003      |

|          |    |          |         |       |         |         |
|----------|----|----------|---------|-------|---------|---------|
| fructose | 9  | 0.45667  | 0.25453 | 0.091 | -0.0803 | 0.9937  |
|          | 10 | -1.10667 | 0.22765 | 0     | -1.587  | -0.6264 |
|          | 1  | 5.01667  | 0.22765 | 0     | 4.5364  | 5.497   |
|          | 2  | 2.85667  | 0.22765 | 0     | 2.3764  | 3.337   |
|          | 3  | 2.89     | 0.25453 | 0     | 2.353   | 3.427   |
|          | 4  | 2.12333  | 0.22765 | 0     | 1.643   | 2.6036  |
|          | 6  | 2.67     | 0.22765 | 0     | 2.1897  | 3.1503  |
|          | 7  | 3.525    | 0.25453 | 0     | 2.988   | 4.062   |
|          | 8  | 3.04333  | 0.22765 | 0     | 2.563   | 3.5236  |
|          | 9  | 2.58     | 0.25453 | 0     | 2.043   | 3.117   |
| xylose   | 10 | 1.01667  | 0.22765 | 0     | 0.5364  | 1.497   |
|          | 1  | 2.34667  | 0.22765 | 0     | 1.8664  | 2.827   |
|          | 2  | 0.18667  | 0.22765 | 0.424 | -0.2936 | 0.667   |
|          | 3  | 0.22     | 0.25453 | 0.399 | -0.317  | 0.757   |
|          | 4  | -0.54667 | 0.22765 | 0.028 | -1.027  | -0.0664 |
|          | 5  | -2.67    | 0.22765 | 0     | -3.1503 | -2.1897 |
|          | 7  | 0.855    | 0.25453 | 0.004 | 0.318   | 1.392   |
|          | 8  | 0.37333  | 0.22765 | 0.119 | -0.107  | 0.8536  |
|          | 9  | -0.09    | 0.25453 | 0.728 | -0.627  | 0.447   |
|          | 10 | -1.65333 | 0.22765 | 0     | -2.1336 | -1.173  |
| Mannitol | 1  | 1.49167  | 0.25453 | 0     | 0.9547  | 2.0287  |
|          | 2  | -0.66833 | 0.25453 | 0.018 | -1.2053 | -0.1313 |
|          | 3  | -0.635   | 0.27882 | 0.036 | -1.2233 | -0.0467 |
|          | 4  | -1.40167 | 0.25453 | 0     | -1.9387 | -0.8647 |
|          | 5  | -3.525   | 0.25453 | 0     | -4.062  | -2.988  |
|          | 6  | -0.855   | 0.25453 | 0.004 | -1.392  | -0.318  |
|          | 8  | -0.48167 | 0.25453 | 0.076 | -1.0187 | 0.0553  |
|          | 9  | -0.945   | 0.27882 | 0.003 | -1.5333 | -0.3567 |
|          | 10 | -2.50833 | 0.25453 | 0     | -3.0453 | -1.9713 |
| Mannose  | 1  | 1.97333  | 0.22765 | 0     | 1.493   | 2.4536  |
|          | 2  | -0.18667 | 0.22765 | 0.424 | -0.667  | 0.2936  |
|          | 3  | -0.15333 | 0.25453 | 0.555 | -0.6903 | 0.3837  |
|          | 4  | -0.92    | 0.22765 | 0.001 | -1.4003 | -0.4397 |
|          | 5  | -3.04333 | 0.22765 | 0     | -3.5236 | -2.563  |
|          | 6  | -0.37333 | 0.22765 | 0.119 | -0.8536 | 0.107   |
|          | 7  | 0.48167  | 0.25453 | 0.076 | -0.0553 | 1.0187  |
|          | 9  | -0.46333 | 0.25453 | 0.086 | -1.0003 | 0.0737  |
|          | 10 | -2.02667 | 0.22765 | 0     | -2.507  | -1.5464 |
| lactose  | 1  | 2.43667  | 0.25453 | 0     | 1.8997  | 2.9737  |
|          | 2  | 0.27667  | 0.25453 | 0.292 | -0.2603 | 0.8137  |
|          | 3  | 0.31     | 0.27882 | 0.282 | -0.2783 | 0.8983  |
|          | 4  | -0.45667 | 0.25453 | 0.091 | -0.9937 | 0.0803  |
|          | 5  | -2.58    | 0.25453 | 0     | -3.117  | -2.043  |
|          | 6  | 0.09     | 0.25453 | 0.728 | -0.447  | 0.627   |

|           |    |          |         |       |         |         |
|-----------|----|----------|---------|-------|---------|---------|
| galactose | 7  | 0.945    | 0.27882 | 0.003 | 0.3567  | 1.5333  |
|           | 8  | 0.46333  | 0.25453 | 0.086 | -0.0737 | 1.0003  |
|           | 10 | -1.56333 | 0.25453 | 0     | -2.1003 | -1.0263 |
|           | 1  | 4        | 0.22765 | 0     | 3.5197  | 4.4803  |
|           | 2  | 1.84     | 0.22765 | 0     | 1.3597  | 2.3203  |
|           | 3  | 1.87333  | 0.25453 | 0     | 1.3363  | 2.4103  |
|           | 4  | 1.10667  | 0.22765 | 0     | 0.6264  | 1.587   |
|           | 5  | -1.01667 | 0.22765 | 0     | -1.497  | -0.5364 |
|           | 6  | 1.65333  | 0.22765 | 0     | 1.173   | 2.1336  |
|           | 7  | 2.50833  | 0.25453 | 0     | 1.9713  | 3.0453  |
|           | 8  | 2.02667  | 0.22765 | 0     | 1.5464  | 2.507   |
|           | 9  | 1.56333  | 0.25453 | 0     | 1.0263  | 2.1003  |

Table S2 significance tests of MS-10 for nitrogen source

| Nitrogen source   | Repeat group number | Mean Difference(I-J) | Standard Error | Significance | 95% confidence interval |             |
|-------------------|---------------------|----------------------|----------------|--------------|-------------------------|-------------|
|                   |                     |                      |                |              | Lower limit             | Upper limit |
| CK                | 2                   | -2.88                | 0.19325        | 0            | -3.2919                 | -2.4681     |
|                   | 3                   | -0.74667             | 0.19325        | 0.002        | -1.1586                 | -0.3348     |
|                   | 4                   | 0.00667              | 0.19325        | 0.973        | -0.4052                 | 0.4186      |
|                   | 5                   | 0.5                  | 0.19325        | 0.021        | 0.0881                  | 0.9119      |
|                   | 6                   | 0.64667              | 0.19325        | 0.004        | 0.2348                  | 1.0586      |
|                   | 7                   | 1.18667              | 0.19325        | 0            | 0.7748                  | 1.5986      |
|                   | 8                   | -1.86333             | 0.21606        | 0            | -2.3239                 | -1.4028     |
|                   |                     |                      |                |              |                         |             |
| Yeast extract     | 1                   | 2.88                 | 0.19325        | 0            | 2.4681                  | 3.2919      |
|                   | 3                   | 2.13333              | 0.19325        | 0            | 1.7214                  | 2.5452      |
|                   | 4                   | 2.88667              | 0.19325        | 0            | 2.4748                  | 3.2986      |
|                   | 5                   | 3.38                 | 0.19325        | 0            | 2.9681                  | 3.7919      |
|                   | 6                   | 3.52667              | 0.19325        | 0            | 3.1148                  | 3.9386      |
|                   | 7                   | 4.06667              | 0.19325        | 0            | 3.6548                  | 4.4786      |
|                   | 8                   | 1.01667              | 0.21606        | 0            | 0.5561                  | 1.4772      |
|                   |                     |                      |                |              |                         |             |
| Peptone           | 1                   | 0.74667              | 0.19325        | 0.002        | 0.3348                  | 1.1586      |
|                   | 2                   | -2.13333             | 0.19325        | 0            | -2.5452                 | -1.7214     |
|                   | 4                   | 0.75333              | 0.19325        | 0.001        | 0.3414                  | 1.1652      |
|                   | 5                   | 1.24667              | 0.19325        | 0            | 0.8348                  | 1.6586      |
|                   | 6                   | 1.39333              | 0.19325        | 0            | 0.9814                  | 1.8052      |
|                   | 7                   | 1.93333              | 0.19325        | 0            | 1.5214                  | 2.3452      |
|                   | 8                   | -1.11667             | 0.21606        | 0            | -1.5772                 | -0.6561     |
|                   |                     |                      |                |              |                         |             |
| Ammonium tartrate | 1                   | -0.00667             | 0.19325        | 0.973        | -0.4186                 | 0.4052      |
|                   | 2                   | -2.88667             | 0.19325        | 0            | -3.2986                 | -2.4748     |

|                  |   |          |         |       |         |         |
|------------------|---|----------|---------|-------|---------|---------|
| Ammonium sulfate | 3 | -0.75333 | 0.19325 | 0.001 | -1.1652 | -0.3414 |
|                  | 5 | 0.49333  | 0.19325 | 0.022 | 0.0814  | 0.9052  |
|                  | 6 | 0.64     | 0.19325 | 0.005 | 0.2281  | 1.0519  |
|                  | 7 | 1.18     | 0.19325 | 0     | 0.7681  | 1.5919  |
|                  | 8 | -1.87    | 0.21606 | 0     | -2.3305 | -1.4095 |
|                  | 1 | -0.5     | 0.19325 | 0.021 | -0.9119 | -0.0881 |
|                  | 2 | -3.38    | 0.19325 | 0     | -3.7919 | -2.9681 |
|                  | 3 | -1.24667 | 0.19325 | 0     | -1.6586 | -0.8348 |
| Ammonium nitrate | 4 | -0.49333 | 0.19325 | 0.022 | -0.9052 | -0.0814 |
|                  | 6 | 0.14667  | 0.19325 | 0.46  | -0.2652 | 0.5586  |
|                  | 7 | 0.68667  | 0.19325 | 0.003 | 0.2748  | 1.0986  |
|                  | 8 | -2.36333 | 0.21606 | 0     | -2.8239 | -1.9028 |
|                  | 1 | -0.64667 | 0.19325 | 0.004 | -1.0586 | -0.2348 |
|                  | 2 | -3.52667 | 0.19325 | 0     | -3.9386 | -3.1148 |
|                  | 3 | -1.39333 | 0.19325 | 0     | -1.8052 | -0.9814 |
|                  | 4 | -0.64    | 0.19325 | 0.005 | -1.0519 | -0.2281 |
| Urea             | 5 | -0.14667 | 0.19325 | 0.46  | -0.5586 | 0.2652  |
|                  | 7 | 0.54     | 0.19325 | 0.014 | 0.1281  | 0.9519  |
|                  | 8 | -2.51    | 0.21606 | 0     | -2.9705 | -2.0495 |
|                  | 1 | -1.18667 | 0.19325 | 0     | -1.5986 | -0.7748 |
|                  | 2 | -4.06667 | 0.19325 | 0     | -4.4786 | -3.6548 |
|                  | 3 | -1.93333 | 0.19325 | 0     | -2.3452 | -1.5214 |
|                  | 4 | -1.18    | 0.19325 | 0     | -1.5919 | -0.7681 |
|                  | 5 | -0.68667 | 0.19325 | 0.003 | -1.0986 | -0.2748 |
| beef extract     | 6 | -0.54    | 0.19325 | 0.014 | -0.9519 | -0.1281 |
|                  | 8 | -3.05    | 0.21606 | 0     | -3.5105 | -2.5895 |
|                  | 1 | 1.86333  | 0.21606 | 0     | 1.4028  | 2.3239  |
|                  | 2 | -1.01667 | 0.21606 | 0     | -1.4772 | -0.5561 |
|                  | 3 | 1.11667  | 0.21606 | 0     | 0.6561  | 1.5772  |
|                  | 4 | 1.87     | 0.21606 | 0     | 1.4095  | 2.3305  |
|                  | 5 | 2.36333  | 0.21606 | 0     | 1.9028  | 2.8239  |
|                  | 6 | 2.51     | 0.21606 | 0     | 2.0495  | 2.9705  |
|                  | 7 | 3.05     | 0.21606 | 0     | 2.5895  | 3.5105  |

Table S3 significance tests of MS- 11 for carbon source

| carbon source | Repeat group number | Mean Difference(I-J) | Standard Error | Significance | 95% confidence interval |             |
|---------------|---------------------|----------------------|----------------|--------------|-------------------------|-------------|
|               |                     |                      |                |              | Lower limit             | Upper limit |
| CK            | 2                   | -2.33667             | 0.37695        | 0            | -3.1401                 | -1.5332     |
|               | 3                   | -1.71                | 0.33716        | 0            | -2.4286                 | -0.9914     |

|          |    |          |         |       |         |         |
|----------|----|----------|---------|-------|---------|---------|
| maltose  | 4  | -2.57167 | 0.37695 | 0     | -3.3751 | -1.7682 |
|          | 5  | -4.9     | 0.33716 | 0     | -5.6186 | -4.1814 |
|          | 6  | -2.66667 | 0.33716 | 0     | -3.3853 | -1.948  |
|          | 7  | -0.75667 | 0.37695 | 0.063 | -1.5601 | 0.0468  |
|          | 8  | -1.49667 | 0.33716 | 0     | -2.2153 | -0.778  |
|          | 9  | -1.64667 | 0.37695 | 0.001 | -2.4501 | -0.8432 |
|          | 10 | -2.85167 | 0.37695 | 0     | -3.6551 | -2.0482 |
|          | 1  | 2.33667  | 0.37695 | 0     | 1.5332  | 3.1401  |
|          | 3  | 0.62667  | 0.37695 | 0.117 | -0.1768 | 1.4301  |
|          | 4  | -0.235   | 0.41293 | 0.578 | -1.1151 | 0.6451  |
| sucrose  | 5  | -2.56333 | 0.37695 | 0     | -3.3668 | -1.7599 |
|          | 6  | -0.33    | 0.37695 | 0.395 | -1.1335 | 0.4735  |
|          | 7  | 1.58     | 0.41293 | 0.002 | 0.6999  | 2.4601  |
|          | 8  | 0.84     | 0.37695 | 0.042 | 0.0365  | 1.6435  |
|          | 9  | 0.69     | 0.41293 | 0.115 | -0.1901 | 1.5701  |
|          | 10 | -0.515   | 0.41293 | 0.231 | -1.3951 | 0.3651  |
|          | 1  | 1.71     | 0.33716 | 0     | 0.9914  | 2.4286  |
|          | 2  | -0.62667 | 0.37695 | 0.117 | -1.4301 | 0.1768  |
|          | 4  | -0.86167 | 0.37695 | 0.037 | -1.6651 | -0.0582 |
|          | 5  | -3.19    | 0.33716 | 0     | -3.9086 | -2.4714 |
| glucose  | 6  | -0.95667 | 0.33716 | 0.012 | -1.6753 | -0.238  |
|          | 7  | 0.95333  | 0.37695 | 0.023 | 0.1499  | 1.7568  |
|          | 8  | 0.21333  | 0.33716 | 0.536 | -0.5053 | 0.932   |
|          | 9  | 0.06333  | 0.37695 | 0.869 | -0.7401 | 0.8668  |
|          | 10 | -1.14167 | 0.37695 | 0.008 | -1.9451 | -0.3382 |
|          | 1  | 2.57167  | 0.37695 | 0     | 1.7682  | 3.3751  |
|          | 2  | 0.235    | 0.41293 | 0.578 | -0.6451 | 1.1151  |
|          | 3  | 0.86167  | 0.37695 | 0.037 | 0.0582  | 1.6651  |
|          | 5  | -2.32833 | 0.37695 | 0     | -3.1318 | -1.5249 |
|          | 6  | -0.095   | 0.37695 | 0.804 | -0.8985 | 0.7085  |
| fructose | 7  | 1.815    | 0.41293 | 0.001 | 0.9349  | 2.6951  |
|          | 8  | 1.075    | 0.37695 | 0.012 | 0.2715  | 1.8785  |
|          | 9  | 0.925    | 0.41293 | 0.041 | 0.0449  | 1.8051  |
|          | 10 | -0.28    | 0.41293 | 0.508 | -1.1601 | 0.6001  |
|          | 1  | 4.9      | 0.33716 | 0     | 4.1814  | 5.6186  |
|          | 2  | 2.56333  | 0.37695 | 0     | 1.7599  | 3.3668  |
|          | 3  | 3.19     | 0.33716 | 0     | 2.4714  | 3.9086  |
|          | 4  | 2.32833  | 0.37695 | 0     | 1.5249  | 3.1318  |
|          | 6  | 2.23333  | 0.33716 | 0     | 1.5147  | 2.952   |
|          | 7  | 4.14333  | 0.37695 | 0     | 3.3399  | 4.9468  |
| xylose   | 8  | 3.40333  | 0.33716 | 0     | 2.6847  | 4.122   |
|          | 9  | 3.25333  | 0.37695 | 0     | 2.4499  | 4.0568  |
|          | 10 | 2.04833  | 0.37695 | 0     | 1.2449  | 2.8518  |
|          | 1  | 2.66667  | 0.33716 | 0     | 1.948   | 3.3853  |

|           |    |          |         |       |         |         |
|-----------|----|----------|---------|-------|---------|---------|
| Mannitol  | 2  | 0.33     | 0.37695 | 0.395 | -0.4735 | 1.1335  |
|           | 3  | 0.95667  | 0.33716 | 0.012 | 0.238   | 1.6753  |
|           | 4  | 0.095    | 0.37695 | 0.804 | -0.7085 | 0.8985  |
|           | 5  | -2.23333 | 0.33716 | 0     | -2.952  | -1.5147 |
|           | 7  | 1.91     | 0.37695 | 0     | 1.1065  | 2.7135  |
|           | 8  | 1.17     | 0.33716 | 0.003 | 0.4514  | 1.8886  |
|           | 9  | 1.02     | 0.37695 | 0.016 | 0.2165  | 1.8235  |
|           | 10 | -0.185   | 0.37695 | 0.631 | -0.9885 | 0.6185  |
|           | 1  | 0.75667  | 0.37695 | 0.063 | -0.0468 | 1.5601  |
|           | 2  | -1.58    | 0.41293 | 0.002 | -2.4601 | -0.6999 |
| Mannose   | 3  | -0.95333 | 0.37695 | 0.023 | -1.7568 | -0.1499 |
|           | 4  | -1.815   | 0.41293 | 0.001 | -2.6951 | -0.9349 |
|           | 5  | -4.14333 | 0.37695 | 0     | -4.9468 | -3.3399 |
|           | 6  | -1.91    | 0.37695 | 0     | -2.7135 | -1.1065 |
|           | 8  | -0.74    | 0.37695 | 0.068 | -1.5435 | 0.0635  |
|           | 9  | -0.89    | 0.41293 | 0.048 | -1.7701 | -0.0099 |
|           | 10 | -2.095   | 0.41293 | 0     | -2.9751 | -1.2149 |
|           | 1  | 1.49667  | 0.33716 | 0     | 0.778   | 2.2153  |
|           | 2  | -0.84    | 0.37695 | 0.042 | -1.6435 | -0.0365 |
|           | 3  | -0.21333 | 0.33716 | 0.536 | -0.932  | 0.5053  |
| lactose   | 4  | -1.075   | 0.37695 | 0.012 | -1.8785 | -0.2715 |
|           | 5  | -3.40333 | 0.33716 | 0     | -4.122  | -2.6847 |
|           | 6  | -1.17    | 0.33716 | 0.003 | -1.8886 | -0.4514 |
|           | 7  | 0.74     | 0.37695 | 0.068 | -0.0635 | 1.5435  |
|           | 9  | -0.15    | 0.37695 | 0.696 | -0.9535 | 0.6535  |
|           | 10 | -1.355   | 0.37695 | 0.003 | -2.1585 | -0.5515 |
|           | 1  | 1.64667  | 0.37695 | 0.001 | 0.8432  | 2.4501  |
|           | 2  | -0.69    | 0.41293 | 0.115 | -1.5701 | 0.1901  |
|           | 3  | -0.06333 | 0.37695 | 0.869 | -0.8668 | 0.7401  |
|           | 4  | -0.925   | 0.41293 | 0.041 | -1.8051 | -0.0449 |
| galactose | 5  | -3.25333 | 0.37695 | 0     | -4.0568 | -2.4499 |
|           | 6  | -1.02    | 0.37695 | 0.016 | -1.8235 | -0.2165 |
|           | 7  | 0.89     | 0.41293 | 0.048 | 0.0099  | 1.7701  |
|           | 8  | 0.15     | 0.37695 | 0.696 | -0.6535 | 0.9535  |
|           | 10 | -1.205   | 0.41293 | 0.011 | -2.0851 | -0.3249 |
|           | 1  | 2.85167  | 0.37695 | 0     | 2.0482  | 3.6551  |
|           | 2  | 0.515    | 0.41293 | 0.231 | -0.3651 | 1.3951  |
|           | 3  | 1.14167  | 0.37695 | 0.008 | 0.3382  | 1.9451  |
|           | 4  | 0.28     | 0.41293 | 0.508 | -0.6001 | 1.1601  |
|           | 5  | -2.04833 | 0.37695 | 0     | -2.8518 | -1.2449 |
|           | 6  | 0.185    | 0.37695 | 0.631 | -0.6185 | 0.9885  |
|           | 7  | 2.095    | 0.41293 | 0     | 1.2149  | 2.9751  |
|           | 8  | 1.355    | 0.37695 | 0.003 | 0.5515  | 2.1585  |
|           | 9  | 1.205    | 0.41293 | 0.011 | 0.3249  | 2.0851  |

---

Table S4 significance tests of MS-11 for nitrogen source

| Nitrogen source   | Repeat group number | Mean Difference(I-J) | Standard Error | Significance | 95% confidence interval |             |
|-------------------|---------------------|----------------------|----------------|--------------|-------------------------|-------------|
|                   |                     |                      |                |              | Lower limit             | Upper limit |
| CK                | 2                   | -3.19667             | 0.15848        | 0            | -3.5326                 | -2.8607     |
|                   | 3                   | -1.79667             | 0.15848        | 0            | -2.1326                 | -1.4607     |
|                   | 4                   | -0.05667             | 0.15848        | 0.725        | -0.3926                 | 0.2793      |
|                   | 5                   | 0.53333              | 0.15848        | 0.004        | 0.1974                  | 0.8693      |
|                   | 6                   | 0.8                  | 0.15848        | 0            | 0.464                   | 1.136       |
|                   | 7                   | 0.9                  | 0.15848        | 0            | 0.564                   | 1.236       |
|                   | 8                   | -2.01667             | 0.15848        | 0            | -2.3526                 | -1.6807     |
| Yeast extract     | 1                   | 3.19667              | 0.15848        | 0            | 2.8607                  | 3.5326      |
|                   | 3                   | 1.4                  | 0.15848        | 0            | 1.064                   | 1.736       |
|                   | 4                   | 3.14                 | 0.15848        | 0            | 2.804                   | 3.476       |
|                   | 5                   | 3.73                 | 0.15848        | 0            | 3.394                   | 4.066       |
|                   | 6                   | 3.99667              | 0.15848        | 0            | 3.6607                  | 4.3326      |
|                   | 7                   | 4.09667              | 0.15848        | 0            | 3.7607                  | 4.4326      |
|                   | 8                   | 1.18                 | 0.15848        | 0            | 0.844                   | 1.516       |
| Peptone           | 1                   | 1.79667              | 0.15848        | 0            | 1.4607                  | 2.1326      |
|                   | 2                   | -1.4                 | 0.15848        | 0            | -1.736                  | -1.064      |
|                   | 4                   | 1.74                 | 0.15848        | 0            | 1.404                   | 2.076       |
|                   | 5                   | 2.33                 | 0.15848        | 0            | 1.994                   | 2.666       |
|                   | 6                   | 2.59667              | 0.15848        | 0            | 2.2607                  | 2.9326      |
|                   | 7                   | 2.69667              | 0.15848        | 0            | 2.3607                  | 3.0326      |
|                   | 8                   | -0.22                | 0.15848        | 0.184        | -0.556                  | 0.116       |
| Ammonium tartrate | 1                   | 0.05667              | 0.15848        | 0.725        | -0.2793                 | 0.3926      |
|                   | 2                   | -3.14                | 0.15848        | 0            | -3.476                  | -2.804      |
|                   | 3                   | -1.74                | 0.15848        | 0            | -2.076                  | -1.404      |
|                   | 5                   | 0.59                 | 0.15848        | 0.002        | 0.254                   | 0.926       |
|                   | 6                   | 0.85667              | 0.15848        | 0            | 0.5207                  | 1.1926      |
|                   | 7                   | 0.95667              | 0.15848        | 0            | 0.6207                  | 1.2926      |
|                   | 8                   | -1.96                | 0.15848        | 0            | -2.296                  | -1.624      |
| Ammonium sulfate  | 1                   | -0.53333             | 0.15848        | 0.004        | -0.8693                 | -0.1974     |
|                   | 2                   | -3.73                | 0.15848        | 0            | -4.066                  | -3.394      |
|                   | 3                   | -2.33                | 0.15848        | 0            | -2.666                  | -1.994      |
|                   | 4                   | -0.59                | 0.15848        | 0.002        | -0.926                  | -0.254      |
|                   | 6                   | 0.26667              | 0.15848        | 0.112        | -0.0693                 | 0.6026      |
|                   | 7                   | 0.36667              | 0.15848        | 0.034        | 0.0307                  | 0.7026      |

|                     |   |          |         |       |         |         |
|---------------------|---|----------|---------|-------|---------|---------|
| Ammonium<br>nitrate | 8 | -2.55    | 0.15848 | 0     | -2.886  | -2.214  |
|                     | 1 | -0.8     | 0.15848 | 0     | -1.136  | -0.464  |
|                     | 2 | -3.99667 | 0.15848 | 0     | -4.3326 | -3.6607 |
|                     | 3 | -2.59667 | 0.15848 | 0     | -2.9326 | -2.2607 |
|                     | 4 | -0.85667 | 0.15848 | 0     | -1.1926 | -0.5207 |
|                     | 5 | -0.26667 | 0.15848 | 0.112 | -0.6026 | 0.0693  |
|                     | 7 | 0.1      | 0.15848 | 0.537 | -0.236  | 0.436   |
|                     | 8 | -2.81667 | 0.15848 | 0     | -3.1526 | -2.4807 |
| Urea                | 1 | -0.9     | 0.15848 | 0     | -1.236  | -0.564  |
|                     | 2 | -4.09667 | 0.15848 | 0     | -4.4326 | -3.7607 |
|                     | 3 | -2.69667 | 0.15848 | 0     | -3.0326 | -2.3607 |
|                     | 4 | -0.95667 | 0.15848 | 0     | -1.2926 | -0.6207 |
|                     | 5 | -0.36667 | 0.15848 | 0.034 | -0.7026 | -0.0307 |
|                     | 6 | -0.1     | 0.15848 | 0.537 | -0.436  | 0.236   |
|                     | 8 | -2.91667 | 0.15848 | 0     | -3.2526 | -2.5807 |
|                     | 1 | 2.01667  | 0.15848 | 0     | 1.6807  | 2.3526  |
| beef extract        | 2 | -1.18    | 0.15848 | 0     | -1.516  | -0.844  |
|                     | 3 | 0.22     | 0.15848 | 0.184 | -0.116  | 0.556   |
|                     | 4 | 1.96     | 0.15848 | 0     | 1.624   | 2.296   |
|                     | 5 | 2.55     | 0.15848 | 0     | 2.214   | 2.886   |
|                     | 6 | 2.81667  | 0.15848 | 0     | 2.4807  | 3.1526  |
|                     | 7 | 2.91667  | 0.15848 | 0     | 2.5807  | 3.2526  |

Table S5 significance tests of MS-12 for carbon source

| carbon<br>source | Repeat<br>group<br>number | Mean<br>Difference(I-J) | Standard<br>Error | Significance | 95% confidence<br>interval |                |
|------------------|---------------------------|-------------------------|-------------------|--------------|----------------------------|----------------|
|                  |                           |                         |                   |              | Lower<br>limit             | Upper<br>limit |
| CK               | 2                         | -1.40833                | 0.49063           | 0.012        | -2.4541                    | -0.3626        |
|                  | 3                         | -1.105                  | 0.49063           | 0.04         | -2.1508                    | -0.0592        |
|                  | 4                         | -2.21                   | 0.53746           | 0.001        | -3.3556                    | -1.0644        |
|                  | 5                         | -3.47833                | 0.49063           | 0            | -4.5241                    | -2.4326        |
|                  | 6                         | -2.41167                | 0.49063           | 0            | -3.4574                    | -1.3659        |
|                  | 7                         | -0.695                  | 0.53746           | 0.216        | -1.8406                    | 0.4506         |
|                  | 8                         | -1.645                  | 0.49063           | 0.004        | -2.6908                    | -0.5992        |
|                  | 9                         | -1.58                   | 0.53746           | 0.01         | -2.7256                    | -0.4344        |
|                  | 10                        | -2.905                  | 0.53746           | 0            | -4.0506                    | -1.7594        |
|                  | 1                         | 1.40833                 | 0.49063           | 0.012        | 0.3626                     | 2.4541         |
| maltose          | 3                         | 0.30333                 | 0.43883           | 0.5          | -0.632                     | 1.2387         |
|                  | 4                         | -0.80167                | 0.49063           | 0.123        | -1.8474                    | 0.2441         |
|                  | 5                         | -2.07                   | 0.43883           | 0            | -3.0054                    | -1.1346        |
|                  | 6                         | -1.00333                | 0.43883           | 0.037        | -1.9387                    | -0.068         |



|          |    |          |         |       |         |         |
|----------|----|----------|---------|-------|---------|---------|
| sucrose  | 7  | 0.71333  | 0.49063 | 0.167 | -0.3324 | 1.7591  |
|          | 8  | -0.23667 | 0.43883 | 0.598 | -1.172  | 0.6987  |
|          | 9  | -0.17167 | 0.49063 | 0.731 | -1.2174 | 0.8741  |
|          | 10 | -1.49667 | 0.49063 | 0.008 | -2.5424 | -0.4509 |
|          | 1  | 1.105    | 0.49063 | 0.04  | 0.0592  | 2.1508  |
|          | 2  | -0.30333 | 0.43883 | 0.5   | -1.2387 | 0.632   |
|          | 4  | -1.105   | 0.49063 | 0.04  | -2.1508 | -0.0592 |
|          | 5  | -2.37333 | 0.43883 | 0     | -3.3087 | -1.438  |
|          | 6  | -1.30667 | 0.43883 | 0.009 | -2.242  | -0.3713 |
|          | 7  | 0.41     | 0.49063 | 0.416 | -0.6358 | 1.4558  |
| glucose  | 8  | -0.54    | 0.43883 | 0.237 | -1.4754 | 0.3954  |
|          | 9  | -0.475   | 0.49063 | 0.348 | -1.5208 | 0.5708  |
|          | 10 | -1.8     | 0.49063 | 0.002 | -2.8458 | -0.7542 |
|          | 1  | 2.21     | 0.53746 | 0.001 | 1.0644  | 3.3556  |
|          | 2  | 0.80167  | 0.49063 | 0.123 | -0.2441 | 1.8474  |
|          | 3  | 1.105    | 0.49063 | 0.04  | 0.0592  | 2.1508  |
|          | 5  | -1.26833 | 0.49063 | 0.021 | -2.3141 | -0.2226 |
|          | 6  | -0.20167 | 0.49063 | 0.687 | -1.2474 | 0.8441  |
|          | 7  | 1.515    | 0.53746 | 0.013 | 0.3694  | 2.6606  |
|          | 8  | 0.565    | 0.49063 | 0.268 | -0.4808 | 1.6108  |
| fructose | 9  | 0.63     | 0.53746 | 0.259 | -0.5156 | 1.7756  |
|          | 10 | -0.695   | 0.53746 | 0.216 | -1.8406 | 0.4506  |
|          | 1  | 3.47833  | 0.49063 | 0     | 2.4326  | 4.5241  |
|          | 2  | 2.07     | 0.43883 | 0     | 1.1346  | 3.0054  |
|          | 3  | 2.37333  | 0.43883 | 0     | 1.438   | 3.3087  |
|          | 4  | 1.26833  | 0.49063 | 0.021 | 0.2226  | 2.3141  |
|          | 6  | 1.06667  | 0.43883 | 0.028 | 0.1313  | 2.002   |
|          | 7  | 2.78333  | 0.49063 | 0     | 1.7376  | 3.8291  |
|          | 8  | 1.83333  | 0.43883 | 0.001 | 0.898   | 2.7687  |
|          | 9  | 1.89833  | 0.49063 | 0.002 | 0.8526  | 2.9441  |
| xylose   | 10 | 0.57333  | 0.49063 | 0.261 | -0.4724 | 1.6191  |
|          | 1  | 2.41167  | 0.49063 | 0     | 1.3659  | 3.4574  |
|          | 2  | 1.00333  | 0.43883 | 0.037 | 0.068   | 1.9387  |
|          | 3  | 1.30667  | 0.43883 | 0.009 | 0.3713  | 2.242   |
|          | 4  | 0.20167  | 0.49063 | 0.687 | -0.8441 | 1.2474  |
|          | 5  | -1.06667 | 0.43883 | 0.028 | -2.002  | -0.1313 |
|          | 7  | 1.71667  | 0.49063 | 0.003 | 0.6709  | 2.7624  |
|          | 8  | 0.76667  | 0.43883 | 0.101 | -0.1687 | 1.702   |
|          | 9  | 0.83167  | 0.49063 | 0.111 | -0.2141 | 1.8774  |
|          | 10 | -0.49333 | 0.49063 | 0.331 | -1.5391 | 0.5524  |
| Mannitol | 1  | 0.695    | 0.53746 | 0.216 | -0.4506 | 1.8406  |
|          | 2  | -0.71333 | 0.49063 | 0.167 | -1.7591 | 0.3324  |
|          | 3  | -0.41    | 0.49063 | 0.416 | -1.4558 | 0.6358  |
|          | 4  | -1.515   | 0.53746 | 0.013 | -2.6606 | -0.3694 |

|           |    |          |         |       |         |         |
|-----------|----|----------|---------|-------|---------|---------|
| Mannose   | 5  | -2.78333 | 0.49063 | 0     | -3.8291 | -1.7376 |
|           | 6  | -1.71667 | 0.49063 | 0.003 | -2.7624 | -0.6709 |
|           | 8  | -0.95    | 0.49063 | 0.072 | -1.9958 | 0.0958  |
|           | 9  | -0.885   | 0.53746 | 0.12  | -2.0306 | 0.2606  |
|           | 10 | -2.21    | 0.53746 | 0.001 | -3.3556 | -1.0644 |
|           | 1  | 1.645    | 0.49063 | 0.004 | 0.5992  | 2.6908  |
|           | 2  | 0.23667  | 0.43883 | 0.598 | -0.6987 | 1.172   |
|           | 3  | 0.54     | 0.43883 | 0.237 | -0.3954 | 1.4754  |
|           | 4  | -0.565   | 0.49063 | 0.268 | -1.6108 | 0.4808  |
|           | 5  | -1.83333 | 0.43883 | 0.001 | -2.7687 | -0.898  |
| lactose   | 6  | -0.76667 | 0.43883 | 0.101 | -1.702  | 0.1687  |
|           | 7  | 0.95     | 0.49063 | 0.072 | -0.0958 | 1.9958  |
|           | 9  | 0.065    | 0.49063 | 0.896 | -0.9808 | 1.1108  |
|           | 10 | -1.26    | 0.49063 | 0.021 | -2.3058 | -0.2142 |
|           | 1  | 1.58     | 0.53746 | 0.01  | 0.4344  | 2.7256  |
|           | 2  | 0.17167  | 0.49063 | 0.731 | -0.8741 | 1.2174  |
|           | 3  | 0.475    | 0.49063 | 0.348 | -0.5708 | 1.5208  |
|           | 4  | -0.63    | 0.53746 | 0.259 | -1.7756 | 0.5156  |
|           | 5  | -1.89833 | 0.49063 | 0.002 | -2.9441 | -0.8526 |
|           | 6  | -0.83167 | 0.49063 | 0.111 | -1.8774 | 0.2141  |
| galactose | 7  | 0.885    | 0.53746 | 0.12  | -0.2606 | 2.0306  |
|           | 8  | -0.065   | 0.49063 | 0.896 | -1.1108 | 0.9808  |
|           | 10 | -1.325   | 0.53746 | 0.026 | -2.4706 | -0.1794 |
|           | 1  | 2.905    | 0.53746 | 0     | 1.7594  | 4.0506  |
|           | 2  | 1.49667  | 0.49063 | 0.008 | 0.4509  | 2.5424  |
|           | 3  | 1.8      | 0.49063 | 0.002 | 0.7542  | 2.8458  |
|           | 4  | 0.695    | 0.53746 | 0.216 | -0.4506 | 1.8406  |
|           | 5  | -0.57333 | 0.49063 | 0.261 | -1.6191 | 0.4724  |
|           | 6  | 0.49333  | 0.49063 | 0.331 | -0.5524 | 1.5391  |
|           | 7  | 2.21     | 0.53746 | 0.001 | 1.0644  | 3.3556  |
|           | 8  | 1.26     | 0.49063 | 0.021 | 0.2142  | 2.3058  |
|           | 9  | 1.325    | 0.53746 | 0.026 | 0.1794  | 2.4706  |

Table S6 significance tests of MS-12 for nitrogen source

| Nitrogen source | Repeat group number | Mean Difference(I-J) | Standard Error | Significance | 95% confidence interval |             |
|-----------------|---------------------|----------------------|----------------|--------------|-------------------------|-------------|
|                 |                     |                      |                |              | Lower limit             | Upper limit |
| CK              | 2                   | -3.03667             | 0.16422        | 0            | -3.3848                 | -2.6885     |
|                 | 3                   | -1.8                 | 0.16422        | 0            | -2.1481                 | -1.4519     |
|                 | 4                   | 0.14667              | 0.16422        | 0.385        | -0.2015                 | 0.4948      |
|                 | 5                   | 0.14                 | 0.16422        | 0.407        | -0.2081                 | 0.4881      |
|                 | 6                   | 0.38333              | 0.16422        | 0.033        | 0.0352                  | 0.7315      |

|                   |   |          |         |       |         |         |
|-------------------|---|----------|---------|-------|---------|---------|
| Yeast extract     | 7 | 0.68333  | 0.16422 | 0.001 | 0.3352  | 1.0315  |
|                   | 8 | -1.95    | 0.16422 | 0     | -2.2981 | -1.6019 |
|                   | 1 | 3.03667  | 0.16422 | 0     | 2.6885  | 3.3848  |
|                   | 3 | 1.23667  | 0.16422 | 0     | 0.8885  | 1.5848  |
|                   | 4 | 3.18333  | 0.16422 | 0     | 2.8352  | 3.5315  |
|                   | 5 | 3.17667  | 0.16422 | 0     | 2.8285  | 3.5248  |
|                   | 6 | 3.42     | 0.16422 | 0     | 3.0719  | 3.7681  |
|                   | 7 | 3.72     | 0.16422 | 0     | 3.3719  | 4.0681  |
| Peptone           | 8 | 1.08667  | 0.16422 | 0     | 0.7385  | 1.4348  |
|                   | 1 | 1.8      | 0.16422 | 0     | 1.4519  | 2.1481  |
|                   | 2 | -1.23667 | 0.16422 | 0     | -1.5848 | -0.8885 |
|                   | 4 | 1.94667  | 0.16422 | 0     | 1.5985  | 2.2948  |
|                   | 5 | 1.94     | 0.16422 | 0     | 1.5919  | 2.2881  |
|                   | 6 | 2.18333  | 0.16422 | 0     | 1.8352  | 2.5315  |
|                   | 7 | 2.48333  | 0.16422 | 0     | 2.1352  | 2.8315  |
|                   | 8 | -0.15    | 0.16422 | 0.375 | -0.4981 | 0.1981  |
| Ammonium tartrate | 1 | -0.14667 | 0.16422 | 0.385 | -0.4948 | 0.2015  |
|                   | 2 | -3.18333 | 0.16422 | 0     | -3.5315 | -2.8352 |
|                   | 3 | -1.94667 | 0.16422 | 0     | -2.2948 | -1.5985 |
|                   | 5 | -0.00667 | 0.16422 | 0.968 | -0.3548 | 0.3415  |
|                   | 6 | 0.23667  | 0.16422 | 0.169 | -0.1115 | 0.5848  |
|                   | 7 | 0.53667  | 0.16422 | 0.005 | 0.1885  | 0.8848  |
|                   | 8 | -2.09667 | 0.16422 | 0     | -2.4448 | -1.7485 |
| Ammonium sulfate  | 1 | -0.14    | 0.16422 | 0.407 | -0.4881 | 0.2081  |
|                   | 2 | -3.17667 | 0.16422 | 0     | -3.5248 | -2.8285 |
|                   | 3 | -1.94    | 0.16422 | 0     | -2.2881 | -1.5919 |
|                   | 4 | 0.00667  | 0.16422 | 0.968 | -0.3415 | 0.3548  |
|                   | 6 | 0.24333  | 0.16422 | 0.158 | -0.1048 | 0.5915  |
|                   | 7 | 0.54333  | 0.16422 | 0.004 | 0.1952  | 0.8915  |
|                   | 8 | -2.09    | 0.16422 | 0     | -2.4381 | -1.7419 |
| Ammonium nitrate  | 1 | -0.38333 | 0.16422 | 0.033 | -0.7315 | -0.0352 |
|                   | 2 | -3.42    | 0.16422 | 0     | -3.7681 | -3.0719 |
|                   | 3 | -2.18333 | 0.16422 | 0     | -2.5315 | -1.8352 |
|                   | 4 | -0.23667 | 0.16422 | 0.169 | -0.5848 | 0.1115  |
|                   | 5 | -0.24333 | 0.16422 | 0.158 | -0.5915 | 0.1048  |
|                   | 7 | 0.3      | 0.16422 | 0.086 | -0.0481 | 0.6481  |
|                   | 8 | -2.33333 | 0.16422 | 0     | -2.6815 | -1.9852 |
| Urea              | 1 | -0.68333 | 0.16422 | 0.001 | -1.0315 | -0.3352 |
|                   | 2 | -3.72    | 0.16422 | 0     | -4.0681 | -3.3719 |
|                   | 3 | -2.48333 | 0.16422 | 0     | -2.8315 | -2.1352 |

|              |   |          |         |       |         |         |
|--------------|---|----------|---------|-------|---------|---------|
| beef extract | 4 | -0.53667 | 0.16422 | 0.005 | -0.8848 | -0.1885 |
|              | 5 | -0.54333 | 0.16422 | 0.004 | -0.8915 | -0.1952 |
|              | 6 | -0.3     | 0.16422 | 0.086 | -0.6481 | 0.0481  |
|              | 8 | -2.63333 | 0.16422 | 0     | -2.9815 | -2.2852 |
|              | 1 | 1.95     | 0.16422 | 0     | 1.6019  | 2.2981  |
|              | 2 | -1.08667 | 0.16422 | 0     | -1.4348 | -0.7385 |
|              | 3 | 0.15     | 0.16422 | 0.375 | -0.1981 | 0.4981  |
|              | 4 | 2.09667  | 0.16422 | 0     | 1.7485  | 2.4448  |
|              | 5 | 2.09     | 0.16422 | 0     | 1.7419  | 2.4381  |
|              | 6 | 2.33333  | 0.16422 | 0     | 1.9852  | 2.6815  |
|              | 7 | 2.63333  | 0.16422 | 0     | 2.2852  | 2.9815  |

Table S7 significance tests of MS-13 for carbon source

| carbon source | Repeat group number | Mean Difference(I-J) | Standard Error | Significance | 95% confidence interval |             |
|---------------|---------------------|----------------------|----------------|--------------|-------------------------|-------------|
|               |                     |                      |                |              | Lower limit             | Upper limit |
| CK            | 2                   | -2.41667             | 0.25796        | 0            | -2.9586                 | -1.8747     |
|               | 3                   | -1.58                | 0.25796        | 0            | -2.1219                 | -1.0381     |
|               | 4                   | -2.32                | 0.25796        | 0            | -2.8619                 | -1.7781     |
|               | 5                   | -4.34667             | 0.25796        | 0            | -4.8886                 | -3.8047     |
|               | 6                   | -2.80333             | 0.25796        | 0            | -3.3453                 | -2.2614     |
|               | 7                   | -1.875               | 0.28841        | 0            | -2.4809                 | -1.2691     |
|               | 8                   | -2.405               | 0.28841        | 0            | -3.0109                 | -1.7991     |
|               | 9                   | -2.34667             | 0.25796        | 0            | -2.8886                 | -1.8047     |
|               | 10                  | -2.99333             | 0.25796        | 0            | -3.5353                 | -2.4514     |
|               | 1                   | 2.41667              | 0.25796        | 0            | 1.8747                  | 2.9586      |
| maltose       | 3                   | 0.83667              | 0.25796        | 0.005        | 0.2947                  | 1.3786      |
|               | 4                   | 0.09667              | 0.25796        | 0.712        | -0.4453                 | 0.6386      |
|               | 5                   | -1.93                | 0.25796        | 0            | -2.4719                 | -1.3881     |
|               | 6                   | -0.38667             | 0.25796        | 0.151        | -0.9286                 | 0.1553      |
|               | 7                   | 0.54167              | 0.28841        | 0.077        | -0.0642                 | 1.1476      |
|               | 8                   | 0.01167              | 0.28841        | 0.968        | -0.5942                 | 0.6176      |
|               | 9                   | 0.07                 | 0.25796        | 0.789        | -0.4719                 | 0.6119      |
|               | 10                  | -0.57667             | 0.25796        | 0.038        | -1.1186                 | -0.0347     |
|               | 1                   | 1.58                 | 0.25796        | 0            | 1.0381                  | 2.1219      |
|               | 2                   | -0.83667             | 0.25796        | 0.005        | -1.3786                 | -0.2947     |
| sucrose       | 4                   | -0.74                | 0.25796        | 0.01         | -1.2819                 | -0.1981     |
|               | 5                   | -2.76667             | 0.25796        | 0            | -3.3086                 | -2.2247     |
|               | 6                   | -1.22333             | 0.25796        | 0            | -1.7653                 | -0.6814     |
|               | 7                   | -0.295               | 0.28841        | 0.32         | -0.9009                 | 0.3109      |
|               | 8                   | -0.825               | 0.28841        | 0.01         | -1.4309                 | -0.2191     |
|               | 9                   | -0.76667             | 0.25796        | 0.008        | -1.3086                 | -0.2247     |

|          |    |          |         |       |         |         |
|----------|----|----------|---------|-------|---------|---------|
| glucose  | 10 | -1.41333 | 0.25796 | 0     | -1.9553 | -0.8714 |
|          | 1  | 2.32     | 0.25796 | 0     | 1.7781  | 2.8619  |
|          | 2  | -0.09667 | 0.25796 | 0.712 | -0.6386 | 0.4453  |
|          | 3  | 0.74     | 0.25796 | 0.01  | 0.1981  | 1.2819  |
|          | 5  | -2.02667 | 0.25796 | 0     | -2.5686 | -1.4847 |
|          | 6  | -0.48333 | 0.25796 | 0.077 | -1.0253 | 0.0586  |
|          | 7  | 0.445    | 0.28841 | 0.14  | -0.1609 | 1.0509  |
|          | 8  | -0.085   | 0.28841 | 0.772 | -0.6909 | 0.5209  |
|          | 9  | -0.02667 | 0.25796 | 0.919 | -0.5686 | 0.5153  |
|          | 10 | -0.67333 | 0.25796 | 0.018 | -1.2153 | -0.1314 |
| fructose | 1  | 4.34667  | 0.25796 | 0     | 3.8047  | 4.8886  |
|          | 2  | 1.93     | 0.25796 | 0     | 1.3881  | 2.4719  |
|          | 3  | 2.76667  | 0.25796 | 0     | 2.2247  | 3.3086  |
|          | 4  | 2.02667  | 0.25796 | 0     | 1.4847  | 2.5686  |
|          | 6  | 1.54333  | 0.25796 | 0     | 1.0014  | 2.0853  |
|          | 7  | 2.47167  | 0.28841 | 0     | 1.8658  | 3.0776  |
|          | 8  | 1.94167  | 0.28841 | 0     | 1.3358  | 2.5476  |
|          | 9  | 2        | 0.25796 | 0     | 1.4581  | 2.5419  |
|          | 10 | 1.35333  | 0.25796 | 0     | 0.8114  | 1.8953  |
|          | 1  | 2.80333  | 0.25796 | 0     | 2.2614  | 3.3453  |
| xylose   | 2  | 0.38667  | 0.25796 | 0.151 | -0.1553 | 0.9286  |
|          | 3  | 1.22333  | 0.25796 | 0     | 0.6814  | 1.7653  |
|          | 4  | 0.48333  | 0.25796 | 0.077 | -0.0586 | 1.0253  |
|          | 5  | -1.54333 | 0.25796 | 0     | -2.0853 | -1.0014 |
|          | 7  | 0.92833  | 0.28841 | 0.005 | 0.3224  | 1.5342  |
|          | 8  | 0.39833  | 0.28841 | 0.184 | -0.2076 | 1.0042  |
|          | 9  | 0.45667  | 0.25796 | 0.094 | -0.0853 | 0.9986  |
|          | 10 | -0.19    | 0.25796 | 0.471 | -0.7319 | 0.3519  |
|          | 1  | 1.875    | 0.28841 | 0     | 1.2691  | 2.4809  |
|          | 2  | -0.54167 | 0.28841 | 0.077 | -1.1476 | 0.0642  |
| Mannitol | 3  | 0.295    | 0.28841 | 0.32  | -0.3109 | 0.9009  |
|          | 4  | -0.445   | 0.28841 | 0.14  | -1.0509 | 0.1609  |
|          | 5  | -2.47167 | 0.28841 | 0     | -3.0776 | -1.8658 |
|          | 6  | -0.92833 | 0.28841 | 0.005 | -1.5342 | -0.3224 |
|          | 8  | -0.53    | 0.31593 | 0.111 | -1.1937 | 0.1337  |
|          | 9  | -0.47167 | 0.28841 | 0.119 | -1.0776 | 0.1342  |
|          | 10 | -1.11833 | 0.28841 | 0.001 | -1.7242 | -0.5124 |
|          | 1  | 2.405    | 0.28841 | 0     | 1.7991  | 3.0109  |
|          | 2  | -0.01167 | 0.28841 | 0.968 | -0.6176 | 0.5942  |
|          | 3  | 0.825    | 0.28841 | 0.01  | 0.2191  | 1.4309  |
| Mannose  | 4  | 0.085    | 0.28841 | 0.772 | -0.5209 | 0.6909  |
|          | 5  | -1.94167 | 0.28841 | 0     | -2.5476 | -1.3358 |
|          | 6  | -0.39833 | 0.28841 | 0.184 | -1.0042 | 0.2076  |
|          | 7  | 0.53     | 0.31593 | 0.111 | -0.1337 | 1.1937  |

|           |    |          |         |       |         |         |
|-----------|----|----------|---------|-------|---------|---------|
| lactose   | 9  | 0.05833  | 0.28841 | 0.842 | -0.5476 | 0.6642  |
|           | 10 | -0.58833 | 0.28841 | 0.056 | -1.1942 | 0.0176  |
|           | 1  | 2.34667  | 0.25796 | 0     | 1.8047  | 2.8886  |
|           | 2  | -0.07    | 0.25796 | 0.789 | -0.6119 | 0.4719  |
|           | 3  | 0.76667  | 0.25796 | 0.008 | 0.2247  | 1.3086  |
|           | 4  | 0.02667  | 0.25796 | 0.919 | -0.5153 | 0.5686  |
|           | 5  | -2       | 0.25796 | 0     | -2.5419 | -1.4581 |
|           | 6  | -0.45667 | 0.25796 | 0.094 | -0.9986 | 0.0853  |
|           | 7  | 0.47167  | 0.28841 | 0.119 | -0.1342 | 1.0776  |
|           | 8  | -0.05833 | 0.28841 | 0.842 | -0.6642 | 0.5476  |
| galactose | 10 | -0.64667 | 0.25796 | 0.022 | -1.1886 | -0.1047 |
|           | 1  | 2.99333  | 0.25796 | 0     | 2.4514  | 3.5353  |
|           | 2  | 0.57667  | 0.25796 | 0.038 | 0.0347  | 1.1186  |
|           | 3  | 1.41333  | 0.25796 | 0     | 0.8714  | 1.9553  |
|           | 4  | 0.67333  | 0.25796 | 0.018 | 0.1314  | 1.2153  |
|           | 5  | -1.35333 | 0.25796 | 0     | -1.8953 | -0.8114 |
|           | 6  | 0.19     | 0.25796 | 0.471 | -0.3519 | 0.7319  |
|           | 7  | 1.11833  | 0.28841 | 0.001 | 0.5124  | 1.7242  |
|           | 8  | 0.58833  | 0.28841 | 0.056 | -0.0176 | 1.1942  |
|           | 9  | 0.64667  | 0.25796 | 0.022 | 0.1047  | 1.1886  |

Table S8 significance tests of MS-13 for nitrogen source

| Nitrogen source | Repeat group number | Mean Difference(I-J) | Standard Error | Significance | 95% confidence interval |             |
|-----------------|---------------------|----------------------|----------------|--------------|-------------------------|-------------|
|                 |                     |                      |                |              | Lower limit             | Upper limit |
| CK              | 2                   | -3.35                | 0.17574        | 0            | -3.7226                 | -2.9774     |
|                 | 3                   | -2.22667             | 0.17574        | 0            | -2.5992                 | -1.8541     |
|                 | 4                   | -0.44333             | 0.17574        | 0.023        | -0.8159                 | -0.0708     |
|                 | 5                   | 0.07667              | 0.17574        | 0.668        | -0.2959                 | 0.4492      |
|                 | 6                   | 0.49667              | 0.17574        | 0.012        | 0.1241                  | 0.8692      |
|                 | 7                   | 0.71667              | 0.17574        | 0.001        | 0.3441                  | 1.0892      |
|                 | 8                   | -2.58                | 0.17574        | 0            | -2.9526                 | -2.2074     |
|                 |                     |                      |                |              |                         |             |
| Yeast extract   | 1                   | 3.35                 | 0.17574        | 0            | 2.9774                  | 3.7226      |
|                 | 3                   | 1.12333              | 0.17574        | 0            | 0.7508                  | 1.4959      |
|                 | 4                   | 2.90667              | 0.17574        | 0            | 2.5341                  | 3.2792      |
|                 | 5                   | 3.42667              | 0.17574        | 0            | 3.0541                  | 3.7992      |
|                 | 6                   | 3.84667              | 0.17574        | 0            | 3.4741                  | 4.2192      |
|                 | 7                   | 4.06667              | 0.17574        | 0            | 3.6941                  | 4.4392      |
|                 | 8                   | 0.77                 | 0.17574        | 0            | 0.3974                  | 1.1426      |
|                 |                     |                      |                |              |                         |             |
| Peptone         | 1                   | 2.22667              | 0.17574        | 0            | 1.8541                  | 2.5992      |

|                   |   |          |         |       |         |         |
|-------------------|---|----------|---------|-------|---------|---------|
|                   | 2 | -1.12333 | 0.17574 | 0     | -1.4959 | -0.7508 |
|                   | 4 | 1.78333  | 0.17574 | 0     | 1.4108  | 2.1559  |
|                   | 5 | 2.30333  | 0.17574 | 0     | 1.9308  | 2.6759  |
|                   | 6 | 2.72333  | 0.17574 | 0     | 2.3508  | 3.0959  |
|                   | 7 | 2.94333  | 0.17574 | 0     | 2.5708  | 3.3159  |
|                   | 8 | -0.35333 | 0.17574 | 0.062 | -0.7259 | 0.0192  |
|                   | 1 | 0.44333  | 0.17574 | 0.023 | 0.0708  | 0.8159  |
|                   | 2 | -2.90667 | 0.17574 | 0     | -3.2792 | -2.5341 |
| Ammonium tartrate | 3 | -1.78333 | 0.17574 | 0     | -2.1559 | -1.4108 |
|                   | 5 | 0.52     | 0.17574 | 0.009 | 0.1474  | 0.8926  |
|                   | 6 | 0.94     | 0.17574 | 0     | 0.5674  | 1.3126  |
|                   | 7 | 1.16     | 0.17574 | 0     | 0.7874  | 1.5326  |
|                   | 8 | -2.13667 | 0.17574 | 0     | -2.5092 | -1.7641 |
|                   | 1 | -0.07667 | 0.17574 | 0.668 | -0.4492 | 0.2959  |
|                   | 2 | -3.42667 | 0.17574 | 0     | -3.7992 | -3.0541 |
|                   | 3 | -2.30333 | 0.17574 | 0     | -2.6759 | -1.9308 |
| Ammonium sulfate  | 4 | -0.52    | 0.17574 | 0.009 | -0.8926 | -0.1474 |
|                   | 6 | 0.42     | 0.17574 | 0.03  | 0.0474  | 0.7926  |
|                   | 7 | 0.64     | 0.17574 | 0.002 | 0.2674  | 1.0126  |
|                   | 8 | -2.65667 | 0.17574 | 0     | -3.0292 | -2.2841 |
|                   | 1 | -0.49667 | 0.17574 | 0.012 | -0.8692 | -0.1241 |
|                   | 2 | -3.84667 | 0.17574 | 0     | -4.2192 | -3.4741 |
|                   | 3 | -2.72333 | 0.17574 | 0     | -3.0959 | -2.3508 |
|                   | 4 | -0.94    | 0.17574 | 0     | -1.3126 | -0.5674 |
| Ammonium nitrate  | 5 | -0.42    | 0.17574 | 0.03  | -0.7926 | -0.0474 |
|                   | 7 | 0.22     | 0.17574 | 0.229 | -0.1526 | 0.5926  |
|                   | 8 | -3.07667 | 0.17574 | 0     | -3.4492 | -2.7041 |
|                   | 1 | -0.71667 | 0.17574 | 0.001 | -1.0892 | -0.3441 |
|                   | 2 | -4.06667 | 0.17574 | 0     | -4.4392 | -3.6941 |
|                   | 3 | -2.94333 | 0.17574 | 0     | -3.3159 | -2.5708 |
|                   | 4 | -1.16    | 0.17574 | 0     | -1.5326 | -0.7874 |
|                   | 5 | -0.64    | 0.17574 | 0.002 | -1.0126 | -0.2674 |
| Urea              | 6 | -0.22    | 0.17574 | 0.229 | -0.5926 | 0.1526  |
|                   | 8 | -3.29667 | 0.17574 | 0     | -3.6692 | -2.9241 |
|                   | 1 | 2.58     | 0.17574 | 0     | 2.2074  | 2.9526  |
|                   | 2 | -0.77    | 0.17574 | 0     | -1.1426 | -0.3974 |
|                   | 3 | 0.35333  | 0.17574 | 0.062 | -0.0192 | 0.7259  |
|                   | 4 | 2.13667  | 0.17574 | 0     | 1.7641  | 2.5092  |
|                   | 5 | 2.65667  | 0.17574 | 0     | 2.2841  | 3.0292  |
|                   | 6 | 3.07667  | 0.17574 | 0     | 2.7041  | 3.4492  |
| beef extract      | 7 | 3.29667  | 0.17574 | 0     | 2.9241  | 3.6692  |

---

Table S9 significance tests of MS-10 for carbon source addition amount

| Carbon source | Repeat group number | Mean Difference(I-J) | Standard Error | Significance | 95% confidence interval |             |
|---------------|---------------------|----------------------|----------------|--------------|-------------------------|-------------|
|               |                     |                      |                |              | Lower limit             | Upper limit |
| 10            | 2                   | -0.4                 | 0.21807        | 0.097        | -0.8859                 | 0.0859      |
|               | 3                   | -1.2                 | 0.21807        | 0            | -1.6859                 | -0.7141     |
|               | 4                   | -0.66667             | 0.21807        | 0.012        | -1.1526                 | -0.1808     |
|               | 5                   | -0.43333             | 0.21807        | 0.075        | -0.9192                 | 0.0526      |
| 15            | 1                   | 0.4                  | 0.21807        | 0.097        | -0.0859                 | 0.8859      |
|               | 3                   | -0.8                 | 0.21807        | 0.004        | -1.2859                 | -0.3141     |
|               | 4                   | -0.26667             | 0.21807        | 0.249        | -0.7526                 | 0.2192      |
|               | 5                   | -0.03333             | 0.21807        | 0.882        | -0.5192                 | 0.4526      |
| 20            | 1                   | 1.2                  | 0.21807        | 0            | 0.7141                  | 1.6859      |
|               | 2                   | 0.8                  | 0.21807        | 0.004        | 0.3141                  | 1.2859      |
|               | 4                   | 0.53333              | 0.21807        | 0.035        | 0.0474                  | 1.0192      |
|               | 5                   | 0.76667              | 0.21807        | 0.006        | 0.2808                  | 1.2526      |
| 25            | 1                   | 0.66667              | 0.21807        | 0.012        | 0.1808                  | 1.1526      |
|               | 2                   | 0.26667              | 0.21807        | 0.249        | -0.2192                 | 0.7526      |
|               | 3                   | -0.53333             | 0.21807        | 0.035        | -1.0192                 | -0.0474     |
|               | 5                   | 0.23333              | 0.21807        | 0.31         | -0.2526                 | 0.7192      |
| 30            | 1                   | 0.43333              | 0.21807        | 0.075        | -0.0526                 | 0.9192      |
|               | 2                   | 0.03333              | 0.21807        | 0.882        | -0.4526                 | 0.5192      |
|               | 3                   | -0.76667             | 0.21807        | 0.006        | -1.2526                 | -0.2808     |
|               | 4                   | -0.23333             | 0.21807        | 0.31         | -0.7192                 | 0.2526      |

Table S10 significance tests of MS-11 for carbon source addition amount

| Carbon source | Repeat group number | Mean Difference(I-J) | Standard Error | Significance | 95% confidence interval |             |
|---------------|---------------------|----------------------|----------------|--------------|-------------------------|-------------|
|               |                     |                      |                |              | Lower limit             | Upper limit |
| 10            | 2                   | -0.83333             | 0.21807        | 0.003        | -1.3192                 | -0.3474     |
|               | 3                   | -1.7                 | 0.21807        | 0            | -2.1859                 | -1.2141     |
|               | 4                   | -1.13333             | 0.21807        | 0            | -1.6192                 | -0.6474     |
|               | 5                   | -0.8                 | 0.21807        | 0.004        | -1.2859                 | -0.3141     |
| 15            | 1                   | 0.83333              | 0.21807        | 0.003        | 0.3474                  | 1.3192      |
|               | 3                   | -0.86667             | 0.21807        | 0.003        | -1.3526                 | -0.3808     |
|               | 4                   | -0.3                 | 0.21807        | 0.199        | -0.7859                 | 0.1859      |
|               | 5                   | 0.03333              | 0.21807        | 0.882        | -0.4526                 | 0.5192      |
| 20            | 1                   | 1.7                  | 0.21807        | 0            | 1.2141                  | 2.1859      |
|               | 2                   | 0.86667              | 0.21807        | 0.003        | 0.3808                  | 1.3526      |



|    |   |          |         |       |         |         |
|----|---|----------|---------|-------|---------|---------|
|    | 4 | 0.56667  | 0.21807 | 0.027 | 0.0808  | 1.0526  |
|    | 5 | 0.9      | 0.21807 | 0.002 | 0.4141  | 1.3859  |
| 25 | 1 | 1.13333  | 0.21807 | 0     | 0.6474  | 1.6192  |
|    | 2 | 0.3      | 0.21807 | 0.199 | -0.1859 | 0.7859  |
|    | 3 | -0.56667 | 0.21807 | 0.027 | -1.0526 | -0.0808 |
|    | 5 | 0.33333  | 0.21807 | 0.157 | -0.1526 | 0.8192  |
| 30 | 1 | 0.8      | 0.21807 | 0.004 | 0.3141  | 1.2859  |
|    | 2 | -0.03333 | 0.21807 | 0.882 | -0.5192 | 0.4526  |
|    | 3 | -0.9     | 0.21807 | 0.002 | -1.3859 | -0.4141 |
|    | 4 | -0.33333 | 0.21807 | 0.157 | -0.8192 | 0.1526  |

Table S11 significance tests of MS- 12 for carbon source addition amount

| Carbon source | Repeat group number | Mean Difference(I-J) | Standard Error | Significance | 95% confidence interval |             |
|---------------|---------------------|----------------------|----------------|--------------|-------------------------|-------------|
|               |                     |                      |                |              | Lower limit             | Upper limit |
| 10            | 2                   | -0.76667             | 0.22211        | 0.006        | -1.2616                 | -0.2718     |
|               | 3                   | -1.43333             | 0.22211        | 0            | -1.9282                 | -0.9384     |
|               | 4                   | -0.73333             | 0.22211        | 0.008        | -1.2282                 | -0.2384     |
|               | 5                   | -0.5                 | 0.22211        | 0.048        | -0.9949                 | -0.0051     |
| 15            | 1                   | 0.76667              | 0.22211        | 0.006        | 0.2718                  | 1.2616      |
|               | 3                   | -0.66667             | 0.22211        | 0.013        | -1.1616                 | -0.1718     |
|               | 4                   | 0.03333              | 0.22211        | 0.884        | -0.4616                 | 0.5282      |
|               | 5                   | 0.26667              | 0.22211        | 0.258        | -0.2282                 | 0.7616      |
| 20            | 1                   | 1.43333              | 0.22211        | 0            | 0.9384                  | 1.9282      |
|               | 2                   | 0.66667              | 0.22211        | 0.013        | 0.1718                  | 1.1616      |
|               | 4                   | 0.7                  | 0.22211        | 0.01         | 0.2051                  | 1.1949      |
|               | 5                   | 0.93333              | 0.22211        | 0.002        | 0.4384                  | 1.4282      |
| 25            | 1                   | 0.73333              | 0.22211        | 0.008        | 0.2384                  | 1.2282      |
|               | 2                   | -0.03333             | 0.22211        | 0.884        | -0.5282                 | 0.4616      |
|               | 3                   | -0.7                 | 0.22211        | 0.01         | -1.1949                 | -0.2051     |
|               | 5                   | 0.23333              | 0.22211        | 0.318        | -0.2616                 | 0.7282      |
| 30            | 1                   | 0.5                  | 0.22211        | 0.048        | 0.0051                  | 0.9949      |
|               | 2                   | -0.26667             | 0.22211        | 0.258        | -0.7616                 | 0.2282      |
|               | 3                   | -0.93333             | 0.22211        | 0.002        | -1.4282                 | -0.4384     |
|               | 4                   | -0.23333             | 0.22211        | 0.318        | -0.7282                 | 0.2616      |

Table S12 significance tests of MS- 13 for carbon source addition amount

| Carbon source | Repeat group number | Mean Difference(I-J) | Standard Error | Significance | 95% confidence interval |             |
|---------------|---------------------|----------------------|----------------|--------------|-------------------------|-------------|
|               |                     |                      |                |              | Lower limit             | Upper limit |

|    |   |          |         |       |         |         |
|----|---|----------|---------|-------|---------|---------|
| 10 | 2 | -0.76667 | 0.17764 | 0.002 | -1.1625 | -0.3709 |
|    | 3 | -1.46667 | 0.17764 | 0     | -1.8625 | -1.0709 |
|    | 4 | -1.2     | 0.17764 | 0     | -1.5958 | -0.8042 |
|    | 5 | -0.8     | 0.17764 | 0.001 | -1.1958 | -0.4042 |
| 15 | 1 | 0.76667  | 0.17764 | 0.002 | 0.3709  | 1.1625  |
|    | 3 | -0.7     | 0.17764 | 0.003 | -1.0958 | -0.3042 |
|    | 4 | -0.43333 | 0.17764 | 0.035 | -0.8291 | -0.0375 |
|    | 5 | -0.03333 | 0.17764 | 0.855 | -0.4291 | 0.3625  |
| 20 | 1 | 1.46667  | 0.17764 | 0     | 1.0709  | 1.8625  |
|    | 2 | 0.7      | 0.17764 | 0.003 | 0.3042  | 1.0958  |
|    | 4 | 0.26667  | 0.17764 | 0.164 | -0.1291 | 0.6625  |
|    | 5 | 0.66667  | 0.17764 | 0.004 | 0.2709  | 1.0625  |
| 25 | 1 | 1.2      | 0.17764 | 0     | 0.8042  | 1.5958  |
|    | 2 | 0.43333  | 0.17764 | 0.035 | 0.0375  | 0.8291  |
|    | 3 | -0.26667 | 0.17764 | 0.164 | -0.6625 | 0.1291  |
|    | 5 | 0.4      | 0.17764 | 0.048 | 0.0042  | 0.7958  |
| 30 | 1 | 0.8      | 0.17764 | 0.001 | 0.4042  | 1.1958  |
|    | 2 | 0.03333  | 0.17764 | 0.855 | -0.3625 | 0.4291  |
|    | 3 | -0.66667 | 0.17764 | 0.004 | -1.0625 | -0.2709 |
|    | 4 | -0.4     | 0.17764 | 0.048 | -0.7958 | -0.0042 |

Table S13 significance tests of MS-10 for nitrogen source addition amount

| Nitrogen source | Repeat group number | Mean Difference(I-J) | Standard Error | Significance | 95% confidence interval |             |
|-----------------|---------------------|----------------------|----------------|--------------|-------------------------|-------------|
|                 |                     |                      |                |              | Lower limit             | Upper limit |
| 2.5             | 2                   | -0.63333             | 0.2087         | 0.013        | -1.0983                 | -0.1683     |
|                 | 3                   | -1.3                 | 0.2087         | 0            | -1.765                  | -0.835      |
|                 | 4                   | -0.73333             | 0.2087         | 0.006        | -1.1983                 | -0.2683     |
|                 | 5                   | -0.2                 | 0.2087         | 0.36         | -0.665                  | 0.265       |
| 5               | 1                   | 0.63333              | 0.2087         | 0.013        | 0.1683                  | 1.0983      |
|                 | 3                   | -0.66667             | 0.2087         | 0.01         | -1.1317                 | -0.2017     |
|                 | 4                   | -0.1                 | 0.2087         | 0.642        | -0.565                  | 0.365       |
|                 | 5                   | 0.43333              | 0.2087         | 0.065        | -0.0317                 | 0.8983      |
| 7.5             | 1                   | 1.3                  | 0.2087         | 0            | 0.835                   | 1.765       |
|                 | 2                   | 0.66667              | 0.2087         | 0.01         | 0.2017                  | 1.1317      |
|                 | 4                   | 0.56667              | 0.2087         | 0.022        | 0.1017                  | 1.0317      |
|                 | 5                   | 1.1                  | 0.2087         | 0            | 0.635                   | 1.565       |
| 10              | 1                   | 0.73333              | 0.2087         | 0.006        | 0.2683                  | 1.1983      |
|                 | 2                   | 0.1                  | 0.2087         | 0.642        | -0.365                  | 0.565       |
|                 | 3                   | -0.56667             | 0.2087         | 0.022        | -1.0317                 | -0.1017     |
|                 | 5                   | 0.53333              | 0.2087         | 0.029        | 0.0683                  | 0.9983      |
| 15              | 1                   | 0.2                  | 0.2087         | 0.36         | -0.265                  | 0.665       |

|  |   |          |        |       |         |         |
|--|---|----------|--------|-------|---------|---------|
|  | 2 | -0.43333 | 0.2087 | 0.065 | -0.8983 | 0.0317  |
|  | 3 | -1.1     | 0.2087 | 0     | -1.565  | -0.635  |
|  | 4 | -0.53333 | 0.2087 | 0.029 | -0.9983 | -0.0683 |

Table S14 significance tests of MS- 11 for nitrogen source addition amount

| Carbon source | Repeat group number | Mean Difference(I-J) | Standard Error | Significance | 95% confidence interval |             |
|---------------|---------------------|----------------------|----------------|--------------|-------------------------|-------------|
|               |                     |                      |                |              | Lower limit             | Upper limit |
| 2.5           | 2                   | -1.06667             | 0.21858        | 0.001        | -1.5611                 | -0.5722     |
|               | 3                   | -1.71667             | 0.24438        | 0            | -2.2695                 | -1.1638     |
|               | 4                   | -1.13333             | 0.21858        | 0.001        | -1.6278                 | -0.6389     |
|               | 5                   | -0.73333             | 0.21858        | 0.008        | -1.2278                 | -0.2389     |
| 5             | 1                   | 1.06667              | 0.21858        | 0.001        | 0.5722                  | 1.5611      |
|               | 3                   | -0.65                | 0.24438        | 0.026        | -1.2028                 | -0.0972     |
|               | 4                   | -0.06667             | 0.21858        | 0.767        | -0.5611                 | 0.4278      |
|               | 5                   | 0.33333              | 0.21858        | 0.162        | -0.1611                 | 0.8278      |
| 7.5           | 1                   | 1.71667              | 0.24438        | 0            | 1.1638                  | 2.2695      |
|               | 2                   | 0.65                 | 0.24438        | 0.026        | 0.0972                  | 1.2028      |
|               | 4                   | 0.58333              | 0.24438        | 0.041        | 0.0305                  | 1.1362      |
|               | 5                   | 0.98333              | 0.24438        | 0.003        | 0.4305                  | 1.5362      |
| 10            | 1                   | 1.13333              | 0.21858        | 0.001        | 0.6389                  | 1.6278      |
|               | 2                   | 0.06667              | 0.21858        | 0.767        | -0.4278                 | 0.5611      |
|               | 3                   | -0.58333             | 0.24438        | 0.041        | -1.1362                 | -0.0305     |
|               | 5                   | 0.4                  | 0.21858        | 0.1          | -0.0945                 | 0.8945      |
| 15            | 1                   | 0.73333              | 0.21858        | 0.008        | 0.2389                  | 1.2278      |
|               | 2                   | -0.33333             | 0.21858        | 0.162        | -0.8278                 | 0.1611      |
|               | 3                   | -0.98333             | 0.24438        | 0.003        | -1.5362                 | -0.4305     |
|               | 4                   | -0.4                 | 0.21858        | 0.1          | -0.8945                 | 0.0945      |

Table S15 significance tests of MS- 12 for nitrogen source addition amount

| Carbon source | Repeat group number | Mean Difference(I-J) | Standard Error | Significance | 95% confidence interval |             |
|---------------|---------------------|----------------------|----------------|--------------|-------------------------|-------------|
|               |                     |                      |                |              | Lower limit             | Upper limit |
| 2.5           | 2                   | -0.53333             | 0.20548        | 0.027        | -0.9912                 | -0.0755     |
|               | 3                   | -1.23333             | 0.20548        | 0            | -1.6912                 | -0.7755     |
|               | 4                   | -0.83333             | 0.20548        | 0.002        | -1.2912                 | -0.3755     |
|               | 5                   | -0.33333             | 0.20548        | 0.136        | -0.7912                 | 0.1245      |
| 5             | 1                   | 0.53333              | 0.20548        | 0.027        | 0.0755                  | 0.9912      |
|               | 3                   | -0.7                 | 0.20548        | 0.007        | -1.1578                 | -0.2422     |
|               | 4                   | -0.3                 | 0.20548        | 0.175        | -0.7578                 | 0.1578      |

|     |   |         |         |       |         |         |
|-----|---|---------|---------|-------|---------|---------|
|     | 5 | 0.2     | 0.20548 | 0.353 | -0.2578 | 0.6578  |
| 7.5 | 1 | 1.23333 | 0.20548 | 0     | 0.7755  | 1.6912  |
|     | 2 | 0.7     | 0.20548 | 0.007 | 0.2422  | 1.1578  |
|     | 4 | 0.4     | 0.20548 | 0.08  | -0.0578 | 0.8578  |
|     | 5 | 0.9     | 0.20548 | 0.001 | 0.4422  | 1.3578  |
| 10  | 1 | 0.83333 | 0.20548 | 0.002 | 0.3755  | 1.2912  |
|     | 2 | 0.3     | 0.20548 | 0.175 | -0.1578 | 0.7578  |
|     | 3 | -0.4    | 0.20548 | 0.08  | -0.8578 | 0.0578  |
|     | 5 | 0.5     | 0.20548 | 0.035 | 0.0422  | 0.9578  |
| 15  | 1 | 0.33333 | 0.20548 | 0.136 | -0.1245 | 0.7912  |
|     | 2 | -0.2    | 0.20548 | 0.353 | -0.6578 | 0.2578  |
|     | 3 | -0.9    | 0.20548 | 0.001 | -1.3578 | -0.4422 |
|     | 4 | -0.5    | 0.20548 | 0.035 | -0.9578 | -0.0422 |

Table S16 significance tests of MS-13 for nitrogen source addition amount

| Carbon source | Repeat group number | Mean Difference(I-J) | Standard Error | Significance | 95% confidence interval |             |
|---------------|---------------------|----------------------|----------------|--------------|-------------------------|-------------|
|               |                     |                      |                |              | Lower limit             | Upper limit |
| 2.5           | 2                   | -0.76667             | 0.19437        | 0.003        | -1.1997                 | -0.3336     |
|               | 3                   | -1.36667             | 0.19437        | 0            | -1.7997                 | -0.9336     |
|               | 4                   | -0.76667             | 0.19437        | 0.003        | -1.1997                 | -0.3336     |
|               | 5                   | -0.06667             | 0.19437        | 0.739        | -0.4997                 | 0.3664      |
| 5             | 1                   | 0.76667              | 0.19437        | 0.003        | 0.3336                  | 1.1997      |
|               | 3                   | -0.6                 | 0.19437        | 0.012        | -1.0331                 | -0.1669     |
|               | 4                   | 0                    | 0.19437        | 1            | -0.4331                 | 0.4331      |
|               | 5                   | 0.7                  | 0.19437        | 0.005        | 0.2669                  | 1.1331      |
| 7.5           | 1                   | 1.36667              | 0.19437        | 0            | 0.9336                  | 1.7997      |
|               | 2                   | 0.6                  | 0.19437        | 0.012        | 0.1669                  | 1.0331      |
|               | 4                   | 0.6                  | 0.19437        | 0.012        | 0.1669                  | 1.0331      |
|               | 5                   | 1.3                  | 0.19437        | 0            | 0.8669                  | 1.7331      |
| 10            | 1                   | 0.76667              | 0.19437        | 0.003        | 0.3336                  | 1.1997      |
|               | 2                   | 0                    | 0.19437        | 1            | -0.4331                 | 0.4331      |
|               | 3                   | -0.6                 | 0.19437        | 0.012        | -1.0331                 | -0.1669     |
|               | 5                   | 0.7                  | 0.19437        | 0.005        | 0.2669                  | 1.1331      |
| 15            | 1                   | 0.06667              | 0.19437        | 0.739        | -0.3664                 | 0.4997      |
|               | 2                   | -0.7                 | 0.19437        | 0.005        | -1.1331                 | -0.2669     |
|               | 3                   | -1.3                 | 0.19437        | 0            | -1.7331                 | -0.8669     |
|               | 4                   | -0.7                 | 0.19437        | 0.005        | -1.1331                 | -0.2669     |

Table S17 significance tests of MS-10 for dandelion addition amount

| Dandelion | Repeat<br>group<br>number | Mean<br>Difference(I-J) | Standard<br>Error | Significance | 95% confidence<br>interval |                |
|-----------|---------------------------|-------------------------|-------------------|--------------|----------------------------|----------------|
|           |                           |                         |                   |              | Lower<br>limit             | Upper<br>limit |
| 0         | 2                         | -0.13333                | 0.19626           | 0.51         | -0.561                     | 0.2943         |
|           | 3                         | -0.56667                | 0.19626           | 0.014        | -0.9943                    | -0.139         |
|           | 4                         | -0.96667                | 0.19626           | 0            | -1.3943                    | -0.539         |
|           | 5                         | -0.56667                | 0.19626           | 0.014        | -0.9943                    | -0.139         |
|           | 6                         | 0.03333                 | 0.19626           | 0.868        | -0.3943                    | 0.461          |
| 0.05      | 1                         | 0.13333                 | 0.19626           | 0.51         | -0.2943                    | 0.561          |
|           | 3                         | -0.43333                | 0.19626           | 0.047        | -0.861                     | -0.0057        |
|           | 4                         | -0.83333                | 0.19626           | 0.001        | -1.261                     | -0.4057        |
|           | 5                         | -0.43333                | 0.19626           | 0.047        | -0.861                     | -0.0057        |
|           | 6                         | 0.16667                 | 0.19626           | 0.412        | -0.261                     | 0.5943         |
| 0.075     | 1                         | 0.56667                 | 0.19626           | 0.014        | 0.139                      | 0.9943         |
|           | 2                         | 0.43333                 | 0.19626           | 0.047        | 0.0057                     | 0.861          |
|           | 4                         | -0.4                    | 0.19626           | 0.064        | -0.8276                    | 0.0276         |
|           | 5                         | 0                       | 0.19626           | 1            | -0.4276                    | 0.4276         |
|           | 6                         | 0.6                     | 0.19626           | 0.01         | 0.1724                     | 1.0276         |
| 0.1       | 1                         | 0.96667                 | 0.19626           | 0            | 0.539                      | 1.3943         |
|           | 2                         | 0.83333                 | 0.19626           | 0.001        | 0.4057                     | 1.261          |
|           | 3                         | 0.4                     | 0.19626           | 0.064        | -0.0276                    | 0.8276         |
|           | 5                         | 0.4                     | 0.19626           | 0.064        | -0.0276                    | 0.8276         |
|           | 6                         | 1                       | 0.19626           | 0            | 0.5724                     | 1.4276         |
| 0.125     | 1                         | 0.56667                 | 0.19626           | 0.014        | 0.139                      | 0.9943         |
|           | 2                         | 0.43333                 | 0.19626           | 0.047        | 0.0057                     | 0.861          |
|           | 3                         | 0                       | 0.19626           | 1            | -0.4276                    | 0.4276         |
|           | 4                         | -0.4                    | 0.19626           | 0.064        | -0.8276                    | 0.0276         |
|           | 6                         | 0.6                     | 0.19626           | 0.01         | 0.1724                     | 1.0276         |
| 0.15      | 1                         | -0.03333                | 0.19626           | 0.868        | -0.461                     | 0.3943         |
|           | 2                         | -0.16667                | 0.19626           | 0.412        | -0.5943                    | 0.261          |
|           | 3                         | -0.6                    | 0.19626           | 0.01         | -1.0276                    | -0.1724        |
|           | 4                         | -1                      | 0.19626           | 0            | -1.4276                    | -0.5724        |
|           | 5                         | -0.6                    | 0.19626           | 0.01         | -1.0276                    | -0.1724        |

Table S18 significance tests of MS-11 for dandelion addition amount

| Dandelion | Repeat<br>group<br>number | Mean<br>Difference(I-J) | Standard<br>Error | Significance | 95% confidence<br>interval |                |
|-----------|---------------------------|-------------------------|-------------------|--------------|----------------------------|----------------|
|           |                           |                         |                   |              | Lower<br>limit             | Upper<br>limit |
| 0         | 2                         | -0.33333                | 0.17427           | 0.08         | -0.713                     | 0.0464         |
|           | 3                         | -0.66667                | 0.17427           | 0.002        | -1.0464                    | -0.287         |

|       |   |          |         |       |         |         |
|-------|---|----------|---------|-------|---------|---------|
| 0.05  | 4 | -1.13333 | 0.17427 | 0     | -1.513  | -0.7536 |
|       | 5 | -0.66667 | 0.17427 | 0.002 | -1.0464 | -0.287  |
|       | 6 | -0.26667 | 0.17427 | 0.152 | -0.6464 | 0.113   |
|       | 1 | 0.33333  | 0.17427 | 0.08  | -0.0464 | 0.713   |
|       | 3 | -0.33333 | 0.17427 | 0.08  | -0.713  | 0.0464  |
| 0.075 | 4 | -0.8     | 0.17427 | 0.001 | -1.1797 | -0.4203 |
|       | 5 | -0.33333 | 0.17427 | 0.08  | -0.713  | 0.0464  |
|       | 6 | 0.06667  | 0.17427 | 0.709 | -0.313  | 0.4464  |
|       | 1 | 0.66667  | 0.17427 | 0.002 | 0.287   | 1.0464  |
|       | 2 | 0.33333  | 0.17427 | 0.08  | -0.0464 | 0.713   |
| 0.1   | 4 | -0.46667 | 0.17427 | 0.02  | -0.8464 | -0.087  |
|       | 5 | 0        | 0.17427 | 1     | -0.3797 | 0.3797  |
|       | 6 | 0.4      | 0.17427 | 0.041 | 0.0203  | 0.7797  |
|       | 1 | 1.13333  | 0.17427 | 0     | 0.7536  | 1.513   |
|       | 2 | 0.8      | 0.17427 | 0.001 | 0.4203  | 1.1797  |
| 0.125 | 3 | 0.46667  | 0.17427 | 0.02  | 0.087   | 0.8464  |
|       | 5 | 0.46667  | 0.17427 | 0.02  | 0.087   | 0.8464  |
|       | 6 | 0.86667  | 0.17427 | 0     | 0.487   | 1.2464  |
|       | 1 | 0.66667  | 0.17427 | 0.002 | 0.287   | 1.0464  |
|       | 2 | 0.33333  | 0.17427 | 0.08  | -0.0464 | 0.713   |
| 0.15  | 3 | 0        | 0.17427 | 1     | -0.3797 | 0.3797  |
|       | 4 | -0.46667 | 0.17427 | 0.02  | -0.8464 | -0.087  |
|       | 6 | 0.4      | 0.17427 | 0.041 | 0.0203  | 0.7797  |
|       | 1 | 0.26667  | 0.17427 | 0.152 | -0.113  | 0.6464  |
|       | 2 | -0.06667 | 0.17427 | 0.709 | -0.4464 | 0.313   |
|       | 3 | -0.4     | 0.17427 | 0.041 | -0.7797 | -0.0203 |
|       | 4 | -0.86667 | 0.17427 | 0     | -1.2464 | -0.487  |
|       | 5 | -0.4     | 0.17427 | 0.041 | -0.7797 | -0.0203 |

Table S19 significance tests of MS-12 for dandelion addition amount

| Dandelion | Repeat group number | Mean Difference(I-J) | Standard Error | Significance | 95% confidence interval |             |
|-----------|---------------------|----------------------|----------------|--------------|-------------------------|-------------|
|           |                     |                      |                |              | Lower limit             | Upper limit |
| 0         | 2                   | -0.16667             | 0.18659        | 0.389        | -0.5732                 | 0.2399      |
|           | 3                   | -0.6                 | 0.18659        | 0.007        | -1.0065                 | -0.1935     |
|           | 4                   | -1.1                 | 0.18659        | 0            | -1.5065                 | -0.6935     |
|           | 5                   | -0.76667             | 0.18659        | 0.001        | -1.1732                 | -0.3601     |
|           | 6                   | -0.4                 | 0.18659        | 0.053        | -0.8065                 | 0.0065      |
| 0.05      | 1                   | 0.16667              | 0.18659        | 0.389        | -0.2399                 | 0.5732      |
|           | 3                   | -0.43333             | 0.18659        | 0.039        | -0.8399                 | -0.0268     |
|           | 4                   | -0.93333             | 0.18659        | 0            | -1.3399                 | -0.5268     |
|           | 5                   | -0.6                 | 0.18659        | 0.007        | -1.0065                 | -0.1935     |

|       |   |          |         |       |         |         |
|-------|---|----------|---------|-------|---------|---------|
| 0.075 | 6 | -0.23333 | 0.18659 | 0.235 | -0.6399 | 0.1732  |
|       | 1 | 0.6      | 0.18659 | 0.007 | 0.1935  | 1.0065  |
|       | 2 | 0.43333  | 0.18659 | 0.039 | 0.0268  | 0.8399  |
|       | 4 | -0.5     | 0.18659 | 0.02  | -0.9065 | -0.0935 |
|       | 5 | -0.16667 | 0.18659 | 0.389 | -0.5732 | 0.2399  |
| 0.1   | 6 | 0.2      | 0.18659 | 0.305 | -0.2065 | 0.6065  |
|       | 1 | 1.1      | 0.18659 | 0     | 0.6935  | 1.5065  |
|       | 2 | 0.93333  | 0.18659 | 0     | 0.5268  | 1.3399  |
|       | 3 | 0.5      | 0.18659 | 0.02  | 0.0935  | 0.9065  |
|       | 5 | 0.33333  | 0.18659 | 0.099 | -0.0732 | 0.7399  |
| 0.125 | 6 | 0.7      | 0.18659 | 0.003 | 0.2935  | 1.1065  |
|       | 1 | 0.76667  | 0.18659 | 0.001 | 0.3601  | 1.1732  |
|       | 2 | 0.6      | 0.18659 | 0.007 | 0.1935  | 1.0065  |
|       | 3 | 0.16667  | 0.18659 | 0.389 | -0.2399 | 0.5732  |
|       | 4 | -0.33333 | 0.18659 | 0.099 | -0.7399 | 0.0732  |
| 0.15  | 6 | 0.36667  | 0.18659 | 0.073 | -0.0399 | 0.7732  |
|       | 1 | 0.4      | 0.18659 | 0.053 | -0.0065 | 0.8065  |
|       | 2 | 0.23333  | 0.18659 | 0.235 | -0.1732 | 0.6399  |
|       | 3 | -0.2     | 0.18659 | 0.305 | -0.6065 | 0.2065  |
|       | 4 | -0.7     | 0.18659 | 0.003 | -1.1065 | -0.2935 |
|       | 5 | -0.36667 | 0.18659 | 0.073 | -0.7732 | 0.0399  |

Table S20 significance tests of MS-13 for dandelion addition amount

| Dandelion | Repeat group number | Mean Difference(I-J) | Standard Error | Significance | 95% confidence interval |             |
|-----------|---------------------|----------------------|----------------|--------------|-------------------------|-------------|
|           |                     |                      |                |              | Lower limit             | Upper limit |
| 0         | 2                   | -0.1                 | 0.24114        | 0.686        | -0.6254                 | 0.4254      |
|           | 3                   | -0.63333             | 0.24114        | 0.022        | -1.1587                 | -0.1079     |
|           | 4                   | -1.16667             | 0.24114        | 0            | -1.6921                 | -0.6413     |
|           | 5                   | -0.4                 | 0.24114        | 0.123        | -0.9254                 | 0.1254      |
|           | 6                   | -0.03333             | 0.24114        | 0.892        | -0.5587                 | 0.4921      |
| 0.05      | 1                   | 0.1                  | 0.24114        | 0.686        | -0.4254                 | 0.6254      |
|           | 3                   | -0.53333             | 0.24114        | 0.047        | -1.0587                 | -0.0079     |
|           | 4                   | -1.06667             | 0.24114        | 0.001        | -1.5921                 | -0.5413     |
|           | 5                   | -0.3                 | 0.24114        | 0.237        | -0.8254                 | 0.2254      |
|           | 6                   | 0.06667              | 0.24114        | 0.787        | -0.4587                 | 0.5921      |
| 0.075     | 1                   | 0.63333              | 0.24114        | 0.022        | 0.1079                  | 1.1587      |
|           | 2                   | 0.53333              | 0.24114        | 0.047        | 0.0079                  | 1.0587      |
|           | 4                   | -0.53333             | 0.24114        | 0.047        | -1.0587                 | -0.0079     |
|           | 5                   | 0.23333              | 0.24114        | 0.352        | -0.2921                 | 0.7587      |
|           | 6                   | 0.6                  | 0.24114        | 0.029        | 0.0746                  | 1.1254      |
| 0.1       | 1                   | 1.16667              | 0.24114        | 0            | 0.6413                  | 1.6921      |

|       |   |          |         |       |         |         |
|-------|---|----------|---------|-------|---------|---------|
| 0.125 | 2 | 1.06667  | 0.24114 | 0.001 | 0.5413  | 1.5921  |
|       | 3 | 0.53333  | 0.24114 | 0.047 | 0.0079  | 1.0587  |
|       | 5 | 0.76667  | 0.24114 | 0.008 | 0.2413  | 1.2921  |
|       | 6 | 1.13333  | 0.24114 | 0.001 | 0.6079  | 1.6587  |
|       | 1 | 0.4      | 0.24114 | 0.123 | -0.1254 | 0.9254  |
|       | 2 | 0.3      | 0.24114 | 0.237 | -0.2254 | 0.8254  |
| 0.15  | 3 | -0.23333 | 0.24114 | 0.352 | -0.7587 | 0.2921  |
|       | 4 | -0.76667 | 0.24114 | 0.008 | -1.2921 | -0.2413 |
|       | 6 | 0.36667  | 0.24114 | 0.154 | -0.1587 | 0.8921  |
|       | 1 | 0.03333  | 0.24114 | 0.892 | -0.4921 | 0.5587  |
|       | 2 | -0.06667 | 0.24114 | 0.787 | -0.5921 | 0.4587  |
|       | 3 | -0.6     | 0.24114 | 0.029 | -1.1254 | -0.0746 |
|       | 4 | -1.13333 | 0.24114 | 0.001 | -1.6587 | -0.6079 |
|       | 5 | -0.36667 | 0.24114 | 0.154 | -0.8921 | 0.1587  |
|       |   |          |         |       |         |         |

---
